# Supplementary material for: Hippo Pathway and YAP Signaling Alterations in Squamous Cancer of the Head and Neck
Source: J Clin Med. 2019 Dec 3;8(12):2131. doi: 10.3390/jcm8122131 (PMC6947155; doi:10.3390/jcm8122131)
Supplement: Supplementary file 1 [file jcm-08-02131-s001.xlsx]

## Sheet: Hoja1
Gene Symbol	Gene name
ANKRD1	ankyrin repeat domain 1
ATAD2	ATPase family AAA domain containing 2
AXL	AXL receptor tyrosine kinase
BLM	Bloom syndrome, RecQ like helicase
CCNE2	cyclin E2
CDC25A	cell division cycle 25A
CDC6	cell division cycle 6
CENPI	centromere protein I
CENPK	centromere protein K
CTGF	CCN2, cellular communication network factor 2
CYR61	CCN1, cellular communication network factor 1
DDAH1	dimethylarginine dimethylaminohydrolase 1
DIAPH3	diaphanous related formin 3
DSCC1	DNA replication and sister chromatid cohesion 1
DTL	denticleless E3 ubiquitin protein ligase homolog
ESCO2	establishment of sister chromatid cohesion N-acetyltransferase
EXO1	exonuclease 1
FAM111B	family with sequence similarity 111 member B
FANCI	FA complementation group I
FSTL1	follistatin like 1
GINS1	GINS complex subunit 1
GINS2	GINS complex subunit 2
HELLS	helicase, lymphoid specific
LMNB1	lamin B1
MCM10	minichromosome maintenance 10 replication initiation factor
MCM6	minichromosome maintenance complex component 6
MYBL1	MYB proto-oncogene like 1
POLE2	DNA polymerase epsilon 2, accessory subunit
RAD51AP1	RAD51 associated protein 1
SLIT2	slit guidance ligand 2
THBS1	thrombospondin 1
